# Supplementary material
Source: PubMed Central journal article supplement (PMC6734146)
Supplement: mjy028_supplementary_material.pdf [file mjy028_supplementary_material.pdf]

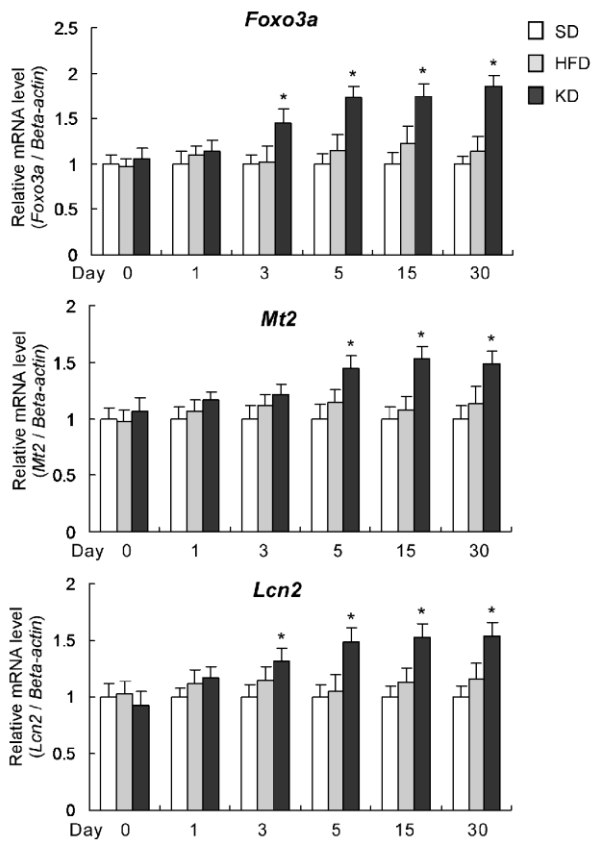

**Supplementary Figure S1** Increase of *Foxo3a*, *Mt2* and *Lcn2* genes' transcriptions in the hypothalamus of KD-mice. The qPCR showed that the mRNA levels of *Foxo3a*, *Mt2* and *Lcn2* genes in the mice after 3- to 30-day ketogenic (KD) diet significantly increased compared with those in the standard-diet (SD) mice. The mRNA levels of the target genes were normalized to the mRNA levels of  $\beta$ -actin. The relative mRNA levels at all time points in the SD mice were normalized as "1". n=5, \* $P < 0.001$ , compared with the mRNA levels at the same time point in the SD mice.

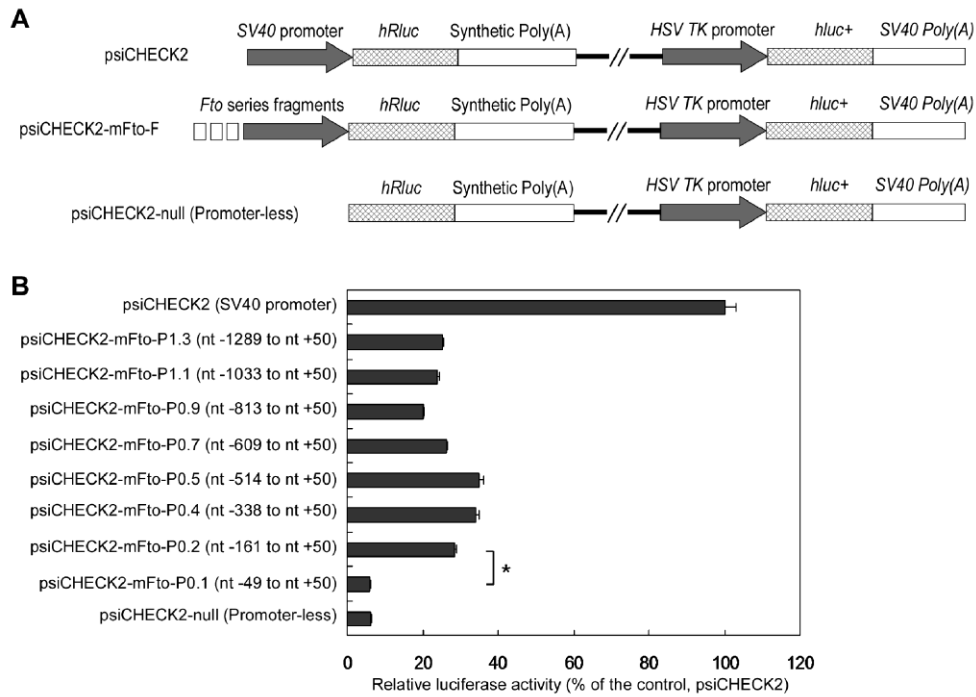

**Supplementary Figure S2** Identification of the *Fto* minimal functional promoter in N1E-115 cells. **(A)** Schematic of the reporter constructs used to determine the minimal functional promoter and upstream regulatory regions. **(B)** Luciferase analysis showing the minimal functional promoter (P0.2: nt -161 to nt +50). n=10, \* $P < 0.001$ .

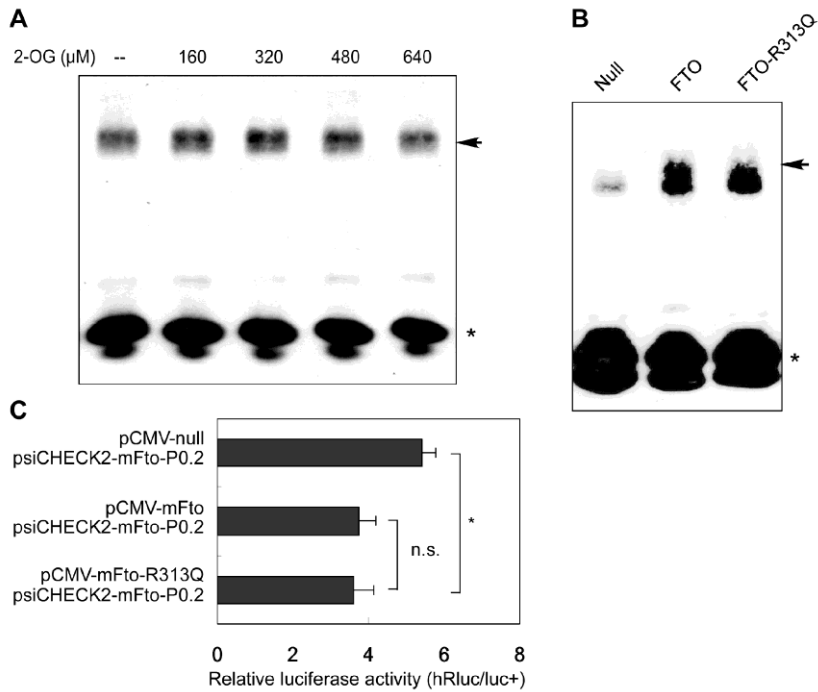

**Supplementary Figure S3** 2-oxoglutarate (2-OG) is not essential for FTO's function as a transcriptional repressor. **(A)** EMSA showing no effect of 2-oxoglutarate (2-OG) on the FTO's binding to the core promoter. The arrow shows the retarded probes. The star shows the free probes. **(B)** EMSA showing no alteration of the binding ability of the mutant FTO-R313Q, an essential site for 2-OG binding, compared with the wild-type FTO. **(C)** Luciferase assays showing no alteration in the promoter activity between that the mutant FTO-R313Q and the wild-type. n = 10, \* $P < 0.001$ .

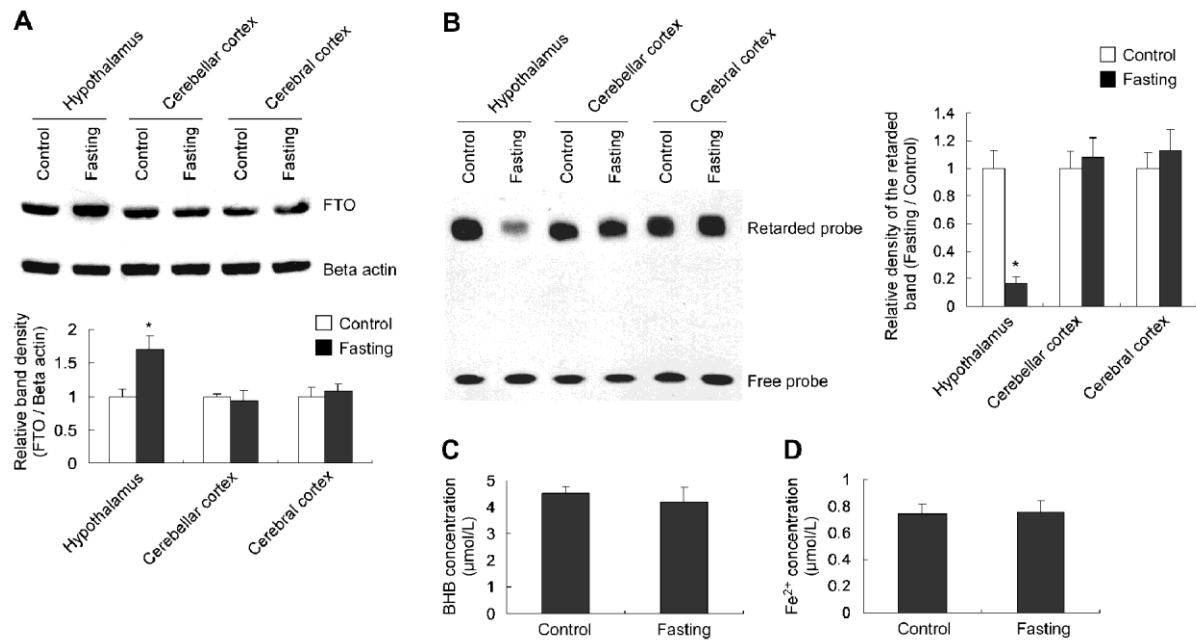

**Supplementary Figure S4** Upregulation of FTO and increase in the FTO's binding to its own promoter in the hypothalamus of 48-hr fasting mice. **(A)** Western blot showing a significant increase of the FTO protein levels in the hypothalamus of the 48-hr fasting mice, but not in cerebellar cortex and cerebral cortex.  $n = 3$ ,  $*P < 0.0001$ . **(B)** EMSA assays showing a significant decrease of the FTO's binding capability to its own promoter in the hypothalamus of the 48-hr fasting mice, but not in cerebellar cortex and cerebral cortex.  $n = 3$ ,  $*P < 0.001$ . **(C-D)** No alteration of BHB and Fe<sup>2+</sup> levels in the hypothalamus of the 48-hr fasting mice, compared with the control mice.  $n = 5$ .
